# Supplementary material for: The cost‐effectiveness of dapagliflozin in treating high‐risk patients with type 2 diabetes mellitus: An economic evaluation using data from the DECLARE‐TIMI 58 trial
Source: PubMed Central journal article supplement — Diabetes Obes Metab. 2021 Jan 25;23(4):1020–9. doi: 10.1111/dom.14308 (PMC8048502; doi:10.1111/dom.14308), 2021-01-25
Supplement: DOM-23-1020-s001.pdf [file DOM-23-1020-s001.pdf]

## Supplementary Material

**Supplementary Table 1.** Summary of survival distributions used in the analysis for each endpoint, per patient subgroup

|                                     | Full population |             |             | Established CVD |             |             | Multiple risk factors |             |             |
|-------------------------------------|-----------------|-------------|-------------|-----------------|-------------|-------------|-----------------------|-------------|-------------|
|                                     | Distribution    | Parameter 1 | Parameter 2 | Distribution    | Parameter 1 | Parameter 2 | Distribution          | Parameter 1 | Parameter 2 |
| <b>Pooled Curves: within-trial</b>  |                 |             |             |                 |             |             |                       |             |             |
| MI                                  | Exponential     | 0.001       | -           | Exponential     | 0.002       | -           | Exponential           | 0.001       | -           |
| 2nd MI                              | Lognormal       | 5.538       | 2.773       | Lognormal       | 5.036       | 2.624       | Weibull               | 0.720       | 661.631     |
| Ischaemic stroke                    | Exponential     | 0.001       | -           | Exponential     | 0.001       | -           | Exponential           | 0.000       | -           |
| 2nd Ischaemic stroke                | Lognormal       | 7.973       | 3.536       | Lognormal       | 8.598       | 3.894       | Lognormal             | 7.169       | 3.057       |
| HAP                                 | Lognormal       | 11.212      | 3.426       | -               | -           | -           | -                     | -           | -           |
| 2nd Hospitalisation for HF          | Lognormal       | 3.855       | 2.267       | Lognormal       | 3.490       | 2.093       | Lognormal             | 4.984       | 2.766       |
| CV mortality                        | Weibull         | 1.162       | 1018.424    | Weibull         | 1.154       | 707.765     | Weibull               | 1.181       | 1447.278    |
| Non-CV mortality                    | Weibull         | 1.576       | 410.652     | Weibull         | 1.630       | 338.452     | Weibull               | 1.530       | 487.555     |
| <b>Pooled Curves: extrapolation</b> |                 |             |             |                 |             |             |                       |             |             |
| MI                                  | Exponential     | 0.001       | -           | Exponential     | 0.002       | -           | Exponential           | 0.001       | -           |
| 2nd MI                              | Lognormal       | 5.538       | 2.773       | Lognormal       | 5.036       | 2.624       | Weibull               | 0.720       | 661.631     |
| Ischaemic Stroke                    | Exponential     | 0.001       | -           | Exponential     | 0.001       | -           | Exponential           | 0.000       | -           |
| 2nd Ischaemic stroke                | Lognormal       | 7.973       | 3.536       | Lognormal       | 8.598       | 3.894       | Lognormal             | 7.169       | 3.057       |
| HAP                                 | Lognormal       | 11.212      | 3.426       | -               | -           | -           | -                     | -           | -           |
| 2nd Hospitalisation for HF          | Lognormal       | 3.855       | 2.267       | Lognormal       | 3.490       | 2.093       | Lognormal             | 4.984       | 2.766       |
| CV mortality                        | Weibull         | 1.162       | 1018.424    | Weibull         | 1.154       | 707.765     | Weibull               | 1.181       | 1447.278    |
| Non-CV mortality                    | Weibull         | 1.576       | 410.652     | Weibull         | 1.630       | 338.452     | Weibull               | 1.530       | 487.555     |
| <b>Dapagliflozin: Within-trial</b>  |                 |             |             |                 |             |             |                       |             |             |
| Hospitalisation for HF              | Weibull         | 1.311       | 806.596     | Log-logistic    | 1.303       | 528.587     | Weibull               | 1.385       | 1126.874    |
| End-stage kidney disease            | Exponential     | 0.000       | -           | Exponential     | 0.000       | -           | Exponential           | 0.000       | -           |
| <b>Dapagliflozin: Extrapolated</b>  |                 |             |             |                 |             |             |                       |             |             |
| Hospitalisation for HF              | Lognormal       | 7.951       | 2.073       | Exponential     | 0.001       | -           | Exponential           | 0.000       | -           |
| End-stage kidney disease            | Exponential     | 0.000       | -           | Exponential     | 0.000       | -           | Exponential           | 0.000       | -           |
| <b>Placebo: Within-trial</b>        |                 |             |             |                 |             |             |                       |             |             |
| Hospitalisation for HF              | Weibull         | 1.093       | 1062.679    | Exponential     | 0.001       | -           | Log-logistic          | 1.169       | 1459.078    |
| End-stage kidney disease            | Exponential     | 0.000       | -           | Exponential     | 0.000       | -           | Exponential           | 0.000       | -           |
| <b>Placebo: Extrapolation</b>       |                 |             |             |                 |             |             |                       |             |             |
| Hospitalisation for HF              | Exponential     | 0.001       | -           | Exponential     | 0.001       | -           | Exponential           | 0.000       | -           |
| End-stage kidney disease            | Exponential     | 0.000       | -           | Exponential     | 0.000       | -           | Exponential           | 0.000       | -           |

|                                     | Prior heart failure |             |             |             | No prior heart failure |             |             |
|-------------------------------------|---------------------|-------------|-------------|-------------|------------------------|-------------|-------------|
|                                     | Distribution        | Parameter 1 | Parameter 2 | Parameter 3 | Distribution           | Parameter 1 | Parameter 2 |
| <b>Pooled Curves: within-trial</b>  |                     |             |             |             |                        |             |             |
| MI                                  | Log-logistic        | 0.898       | 669.546     | -           | Exponential            | 0.001       | -           |
| 2nd MI                              | Lognormal           | 5.036       | 2.687       | -           | Lognormal              | 5.645       | 2.786       |
| Ischaemic Stroke                    | Exponential         | 0.001       | -           | -           | Exponential            | 0.001       | -           |
| 2nd Ischaemic stroke                | Exponential         | 0.002       | -           | -           | Lognormal              | 7.678       | 3.446       |
| HAP                                 | -                   | -           | -           | -           | -                      | -           | -           |
| 2nd Hospitalisation for HF          | Lognormal           | 3.264       | 1.836       | -           | Lognormal              | 4.544       | 2.719       |
| CV mortality                        | Exponential         | 0.002       | -           | -           | Weibull                | 1.203       | 1138.347    |
| Non-CV mortality                    | Weibull             | 1.665       | 271.147     | -           | Weibull                | 1.565       | 436.234     |
| <b>Pooled Curves: extrapolation</b> |                     |             |             |             |                        |             |             |
| MI                                  | Weibull             | 0.878       | 749.996     | -           | Lognormal              | 7.952       | 2.402       |
| 2nd MI                              | Lognormal           | 5.036       | 2.687       | -           | Lognormal              | 5.645       | 2.786       |
| Ischaemic Stroke                    | Exponential         | 0.001       | -           | -           | Lognormal              | 9.233       | 2.741       |
| 2nd Ischaemic stroke                | Exponential         | 0.002       | -           | -           | Lognormal              | 7.678       | 3.446       |
| HAP                                 | -                   | -           | -           | -           | -                      | -           | -           |
| 2nd Hospitalisation for HF          | Lognormal           | 3.264       | 1.836       | -           | Lognormal              | 4.544       | 2.719       |
| CV mortality                        | Exponential         | 0.002       | -           | -           | Weibull                | 1.203       | 1138.347    |
| Non-CV mortality                    | Weibull             | 1.665       | 271.147     | -           | Weibull                | 1.565       | 436.234     |
| <b>Dapagliflozin: Within-trial</b>  |                     |             |             |             |                        |             |             |
| Hospitalisation for HF              | Log-logistic        | 1.203       | 282.721     | -           | Log-logistic           | 1.491       | 764.713     |
| End-stage kidney disease            | Exponential         | 0.000       | -           | -           | Exponential            | 0.000       | -           |
| <b>Dapagliflozin: Extrapolated</b>  |                     |             |             |             |                        |             |             |
| Hospitalisation for HF              | Lognormal           | 6.237       | 1.888       | -           | Log-logistic           | 1.491       | 764.713     |
| End-stage kidney disease            | Exponential         | 0.000       | -           | -           | Exponential            | 0.000       | -           |
| <b>Placebo: Within-trial</b>        |                     |             |             |             |                        |             |             |
| Hospitalisation for HF              | Lognormal           | 6.285       | 2.209       | -           | Weibull                | 1.291       | 915.487     |
| End-stage kidney disease            | Exponential         | 0.000       | -           | -           | Exponential            | 0.000       | -           |
| <b>Placebo: Extrapolation</b>       |                     |             |             |             |                        |             |             |
| Hospitalisation for HF              | Gen-gamma           | 6.230       | 1.936       | 0.220       | Weibull                | 1.291       | 915.487     |
| End-stage kidney disease            | Exponential         | 0.000       | -           | -           | Exponential            | 0.000       | -           |

CV: cardiovascular; CVD: cardiovascular disease; HAP: hospitalisation for unstable angina; HF: heart failure; MI: myocardial infarction

**Supplementary Table 2.** Treatment effects on modifiable risk factors and incidence of adverse events and discontinuation

| Variable                                      | Control | Treatment | Source                            |
|-----------------------------------------------|---------|-----------|-----------------------------------|
| Change in risk factor level:                  |         |           |                                   |
| HbA1c (%)                                     | -0.151  | -0.679    | Wiviott et al. 2019 <sup>1</sup>  |
| Weight (kg)                                   | -0.630  | -2.415    | Wiviott et al. 2019 <sup>1</sup>  |
| SBP (mmHg)                                    | -0.409  | -2.810    | Wiviott et al. 2019 <sup>1</sup>  |
| eGFR change (mL/min/1.73m <sup>2</sup> /year) | -2.44   | -1.78     | Mosenzon et al. 2019 <sup>2</sup> |
| Annual probability of event:                  |         |           |                                   |
| Diabetic ketoacidosis                         | 0.0003  | 0.0007    | Wiviott et al. 2019 <sup>1</sup>  |
| Urinary tract infection                       | 0.0037  | 0.0035    | Wiviott et al. 2019 <sup>1</sup>  |
| Genital infection                             | 0.0003  | 0.0021    | Wiviott et al. 2019 <sup>1</sup>  |
| Kidney injury                                 | 0.0049  | 0.0035    | Wiviott et al. 2019 <sup>1</sup>  |
| Fracture                                      | 0.0122  | 0.0126    | Wiviott et al. 2019 <sup>1</sup>  |
| Discontinuation                               | 0.0490  | 0.0000    | Wiviott et al. 2019 <sup>1</sup>  |

eGFR: estimated glomerular filtration rate; SBP: systolic blood pressure

Where data required by the UKPDS 82 risk equations was unavailable, UKPDS values were applied

**Supplementary Table 3.** Annual cost and health-related utility inputs

| Variable                | Costs   |                                            | Utilities |                                                                               |
|-------------------------|---------|--------------------------------------------|-----------|-------------------------------------------------------------------------------|
|                         | Cost    | Source                                     | Utility   | Source                                                                        |
| Baseline utility        | -       | -                                          | 0.785     | UKPDS 62 <sup>3</sup>                                                         |
| HAP, fatal event        | £716    | NHS Reference cost<br>2018/19 <sup>4</sup> | -         | -                                                                             |
| HAP, non-fatal event    | £716    | NHS Reference cost<br>2018/19 <sup>4</sup> | 0.042     | Sullivan et al. <sup>5</sup>                                                  |
| HAP, maintenance        | £412    | NICE CG181 <sup>6</sup>                    | 0.042     | Sullivan et al. <sup>5</sup>                                                  |
| MI, fatal event         | £1,674  | UKPDS 84 <sup>7</sup>                      | -         | -                                                                             |
| MI, non-fatal event     | £8,080  | UKPDS 84 <sup>7</sup>                      | -0.055    | UKPDS 62 <sup>3</sup>                                                         |
| MI, maintenance         | £2,008  | UKPDS 84 <sup>7</sup>                      | -0.055    | UKPDS 62 <sup>3</sup>                                                         |
| HF, event               | £4,589  | UKPDS 84 <sup>7</sup>                      | -0.108    | UKPDS 62 <sup>3</sup>                                                         |
| HF, maintenance         | £2,692  | UKPDS 84 <sup>7</sup>                      | -0.108    | UKPDS 62 <sup>3</sup>                                                         |
| Stroke, fatal event     | £4,351  | UKPDS 84 <sup>7</sup>                      | -         | -                                                                             |
| Stroke, non-fatal event | £8,689  | UKPDS 84 <sup>7</sup>                      | -0.164    | UKPDS 62 <sup>3</sup>                                                         |
| Stroke, maintenance     | £2,070  | UKPDS 84 <sup>7</sup>                      | -0.164    | UKPDS 62 <sup>3</sup>                                                         |
| Blindness, event        | £3,461  | UKPDS 84 <sup>7</sup>                      | -0.074    | Bagust et al. <sup>8</sup>                                                    |
| Blindness, maintenance  | £1,311  | UKPDS 84 <sup>7</sup>                      | -0.074    | Bagust et al. <sup>8</sup>                                                    |
| Ulcer, event            | £4,701  | UKPDS 84 <sup>7</sup>                      | -0.17     | Bagust et al. <sup>8</sup>                                                    |
| Ulcer, maintenance      | £5,693  | UKPDS 84 <sup>7</sup> ;                    | -0.17     | Bagust et al. <sup>8</sup>                                                    |
| CKD 1                   | £0      | Assumption                                 | 0         | Gorodetskaya et al. <sup>9</sup>                                              |
| CKD 2                   | £0      | Assumption                                 | 0         | Gorodetskaya et al. <sup>9</sup>                                              |
| CKD 3                   | £3,611# | NICE CG182 <sup>10</sup>                   | -0.03     | Gorodetskaya et al. <sup>9</sup>                                              |
| CKD 4                   | £3,611# | NICE CG182 <sup>10</sup>                   | -0.05     | Gorodetskaya et al. <sup>9</sup>                                              |
| CKD 5 (pre-dialysis)    | £5,633# | NICE CG182 <sup>10</sup>                   | -0.05     | Gorodetskaya et al. <sup>9</sup>                                              |
| ESKD                    | £38,937 | Lamping et al. 2000 <sup>11</sup>          | -0.164    | Wasserfallen et al. <sup>12</sup>                                             |
| Diabetic ketoacidosis   | £2,209  | Dhatariya et al. <sup>13</sup>             | 0         | No evidence identified<br>Assumed equal to UTI; Barry<br>et al. <sup>15</sup> |
| Genital infection       | £39     | PSSRU <sup>14</sup>                        | -0.00283  | Barry et al. <sup>15</sup>                                                    |
| Urinary tract infection | £39     | PSSRU <sup>14</sup>                        | -0.00283  | Barry et al. <sup>15</sup>                                                    |
| Acute kidney injury     | £1,810  | NHS Reference cost<br>2018/19 <sup>4</sup> | -0.11040  | Sullivan et al. <sup>5</sup>                                                  |
| Fracture                | £2,211  | NHS Reference cost<br>2018/19 <sup>4</sup> | -0.06800  | Sullivan et al. <sup>5</sup>                                                  |
| Dapagliflozin           | £477    | MIMS <sup>16</sup>                         |           |                                                                               |
| BMI (per unit decrease) | -       | -                                          | -0.047    | Lane et al. <sup>17</sup>                                                     |
| BMI (per unit increase) |         |                                            | 0.017     | Lane et al. <sup>17</sup>                                                     |

BMI: body mass index; CKD: chronic kidney disease; ESKD: end-stage kidney disease; HAP: hospitalisation for unstable angina pectoris; HF: heart failure; MI: myocardial infarction; SGLT2i: sodium–glucose cotransporter-2 inhibitor; T2DM: type 2 diabetes

\* Costs relate to primary care and diabetes medications

# CKD care, comprising inpatient stays, nephrology outpatient visits, antihypertensive drugs, and GP visits

**Supplementary Table 4.** National level estimates based on overall DECLARE-TIMI 58 population; number of individuals and health economic estimates reported in millions

| Parameter                                | UK                |
|------------------------------------------|-------------------|
| Number of people: (millions)             |                   |
| with diabetes                            | 3.9               |
| with T2DM (90%)                          | 3.5               |
| represented by DECLARE percentage        | 59% <sup>18</sup> |
| represented by DECLARE number of people  | 2.1               |
| Health economic impact of dapagliflozin: |                   |
| Total cost difference                    | -£5,311           |
| Total life years gained                  | 0.0               |
| Total QALYs gained                       | 0.1               |
| Incremental NMB                          | £7,616            |

CVOT: cardiovascular outcome trial; NMB: net monetary benefit; QALYs: quality-adjusted life years; SGLT2i: sodium-glucose cotransporter-2 inhibitor; T2DM: type 2 diabetes mellitus

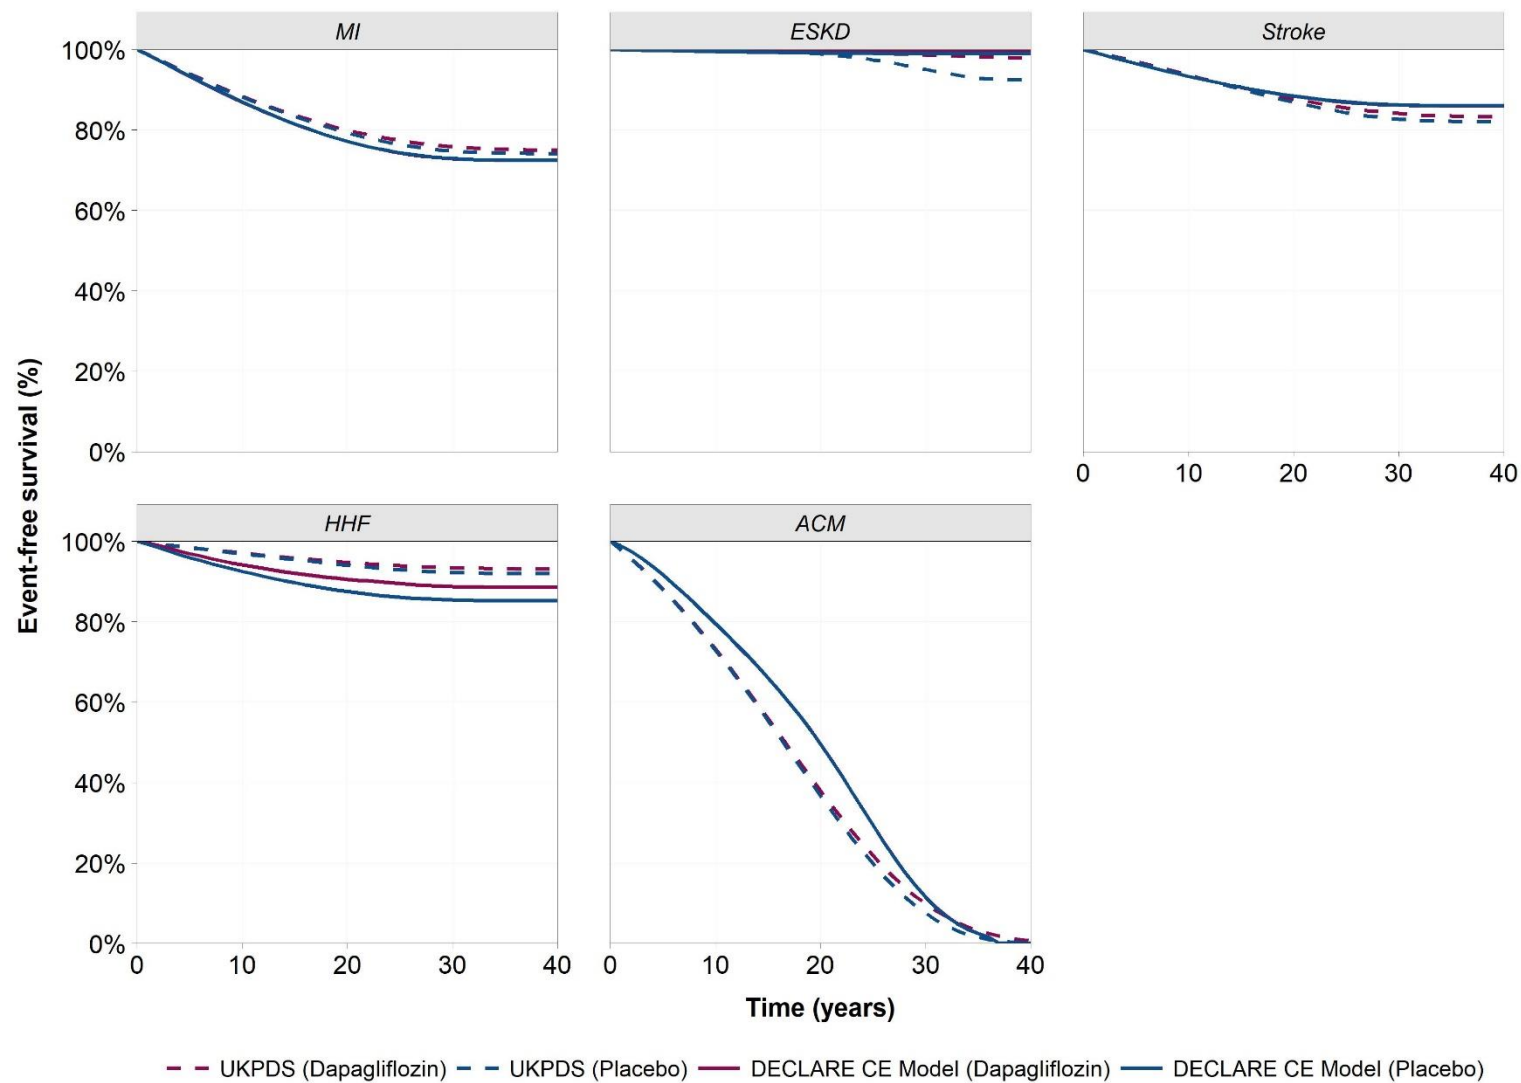

**Supplementary Figure 1.** Outcomes predicted for the overall DECLARE population using the DECLARE CE Model, validated to UKPDS 82 equations  
 ACM: all-cause mortality; ESKD: end-stage kidney disease; HHF: hospitalisation for heart failure; MI: myocardial infarction

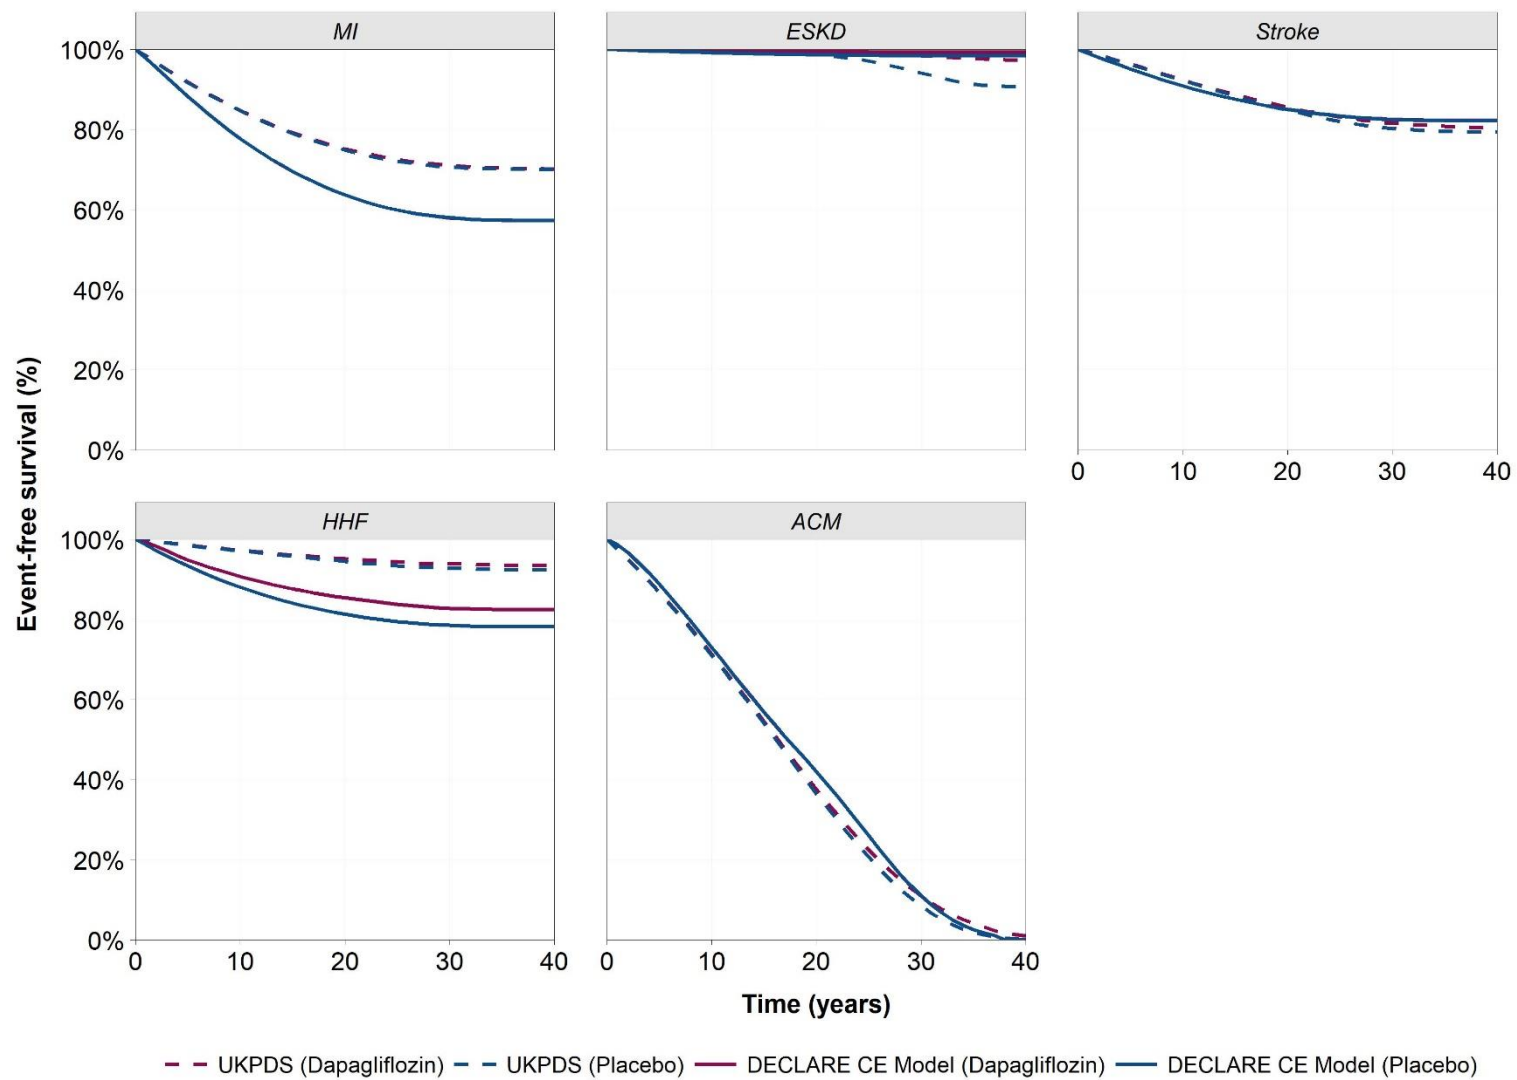

**Supplementary Figure 2.** Outcomes predicted for the eCVD DECLARE population using the DECLARE CE Model, validated to UKPDS 82 equations

ACM: all-cause mortality; eCVD: established cardiovascular disease; ESKD: end-stage kidney disease; HHF: hospitalisation for heart failure; MI: myocardial infarction

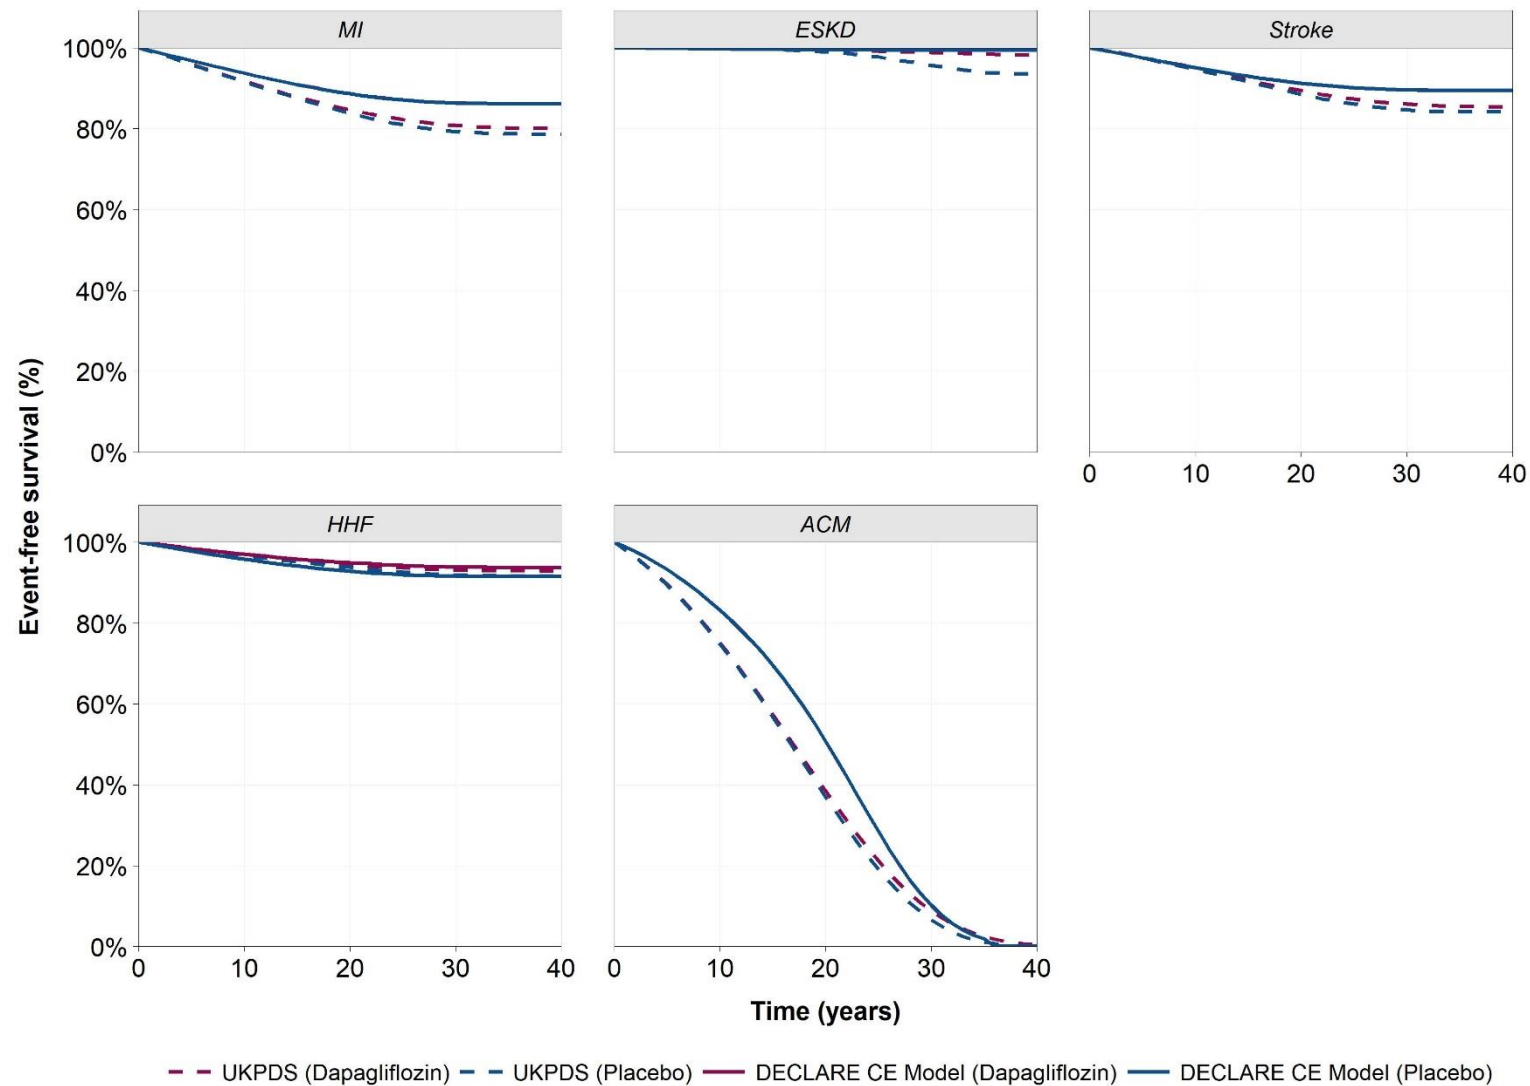

**Supplementary Figure 3.** Outcomes predicted for the MRF DECLARE population using the DECLARE CE Model, validated to UKPDS 82 equations  
 ACM: all-cause mortality; ESKD: end-stage kidney disease; HHF: hospitalisation for heart failure; MI: myocardial infarction; MRF: multiple risk factor



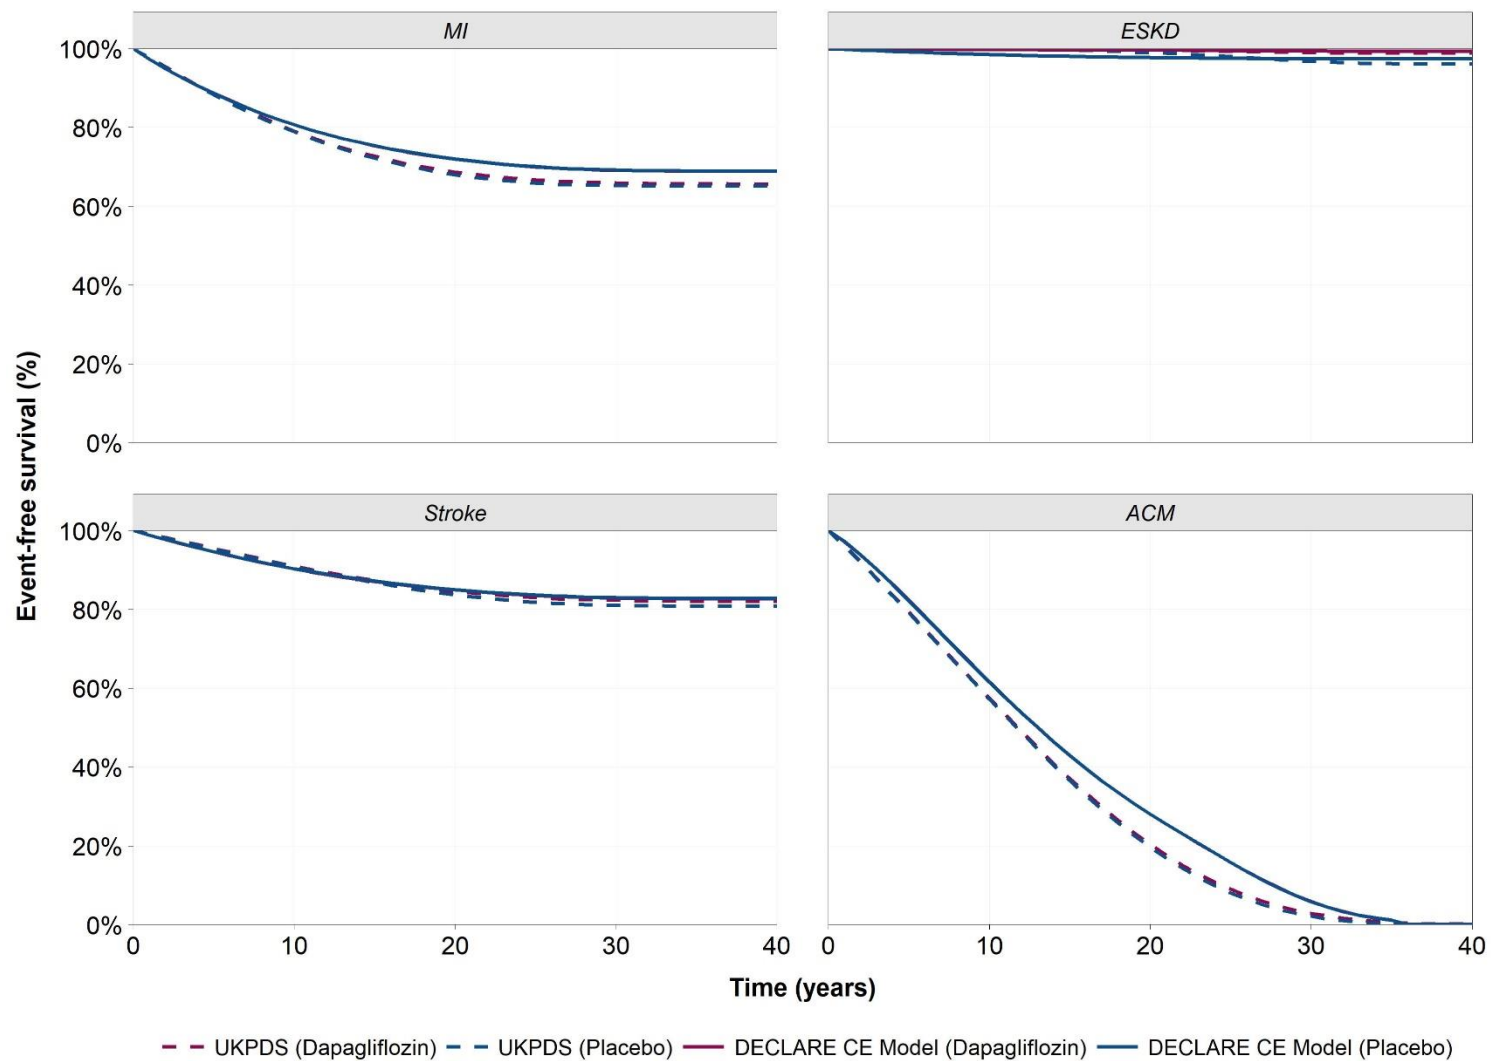

**Supplementary Figure 4.** Outcomes predicted for the prior HF DECLARE population using the DECLARE CE Model, validated to UKPDS 82 equations

ACM: all-cause mortality; CHF: congestive heart failure; ESKD: end-stage kidney disease; HF: heart failure; HHF: hospitalisation for heart failure; MI: myocardial infarction

Note: HHF not included as an event as UKPDS equations do not model CHF for those with a prior history of HF.

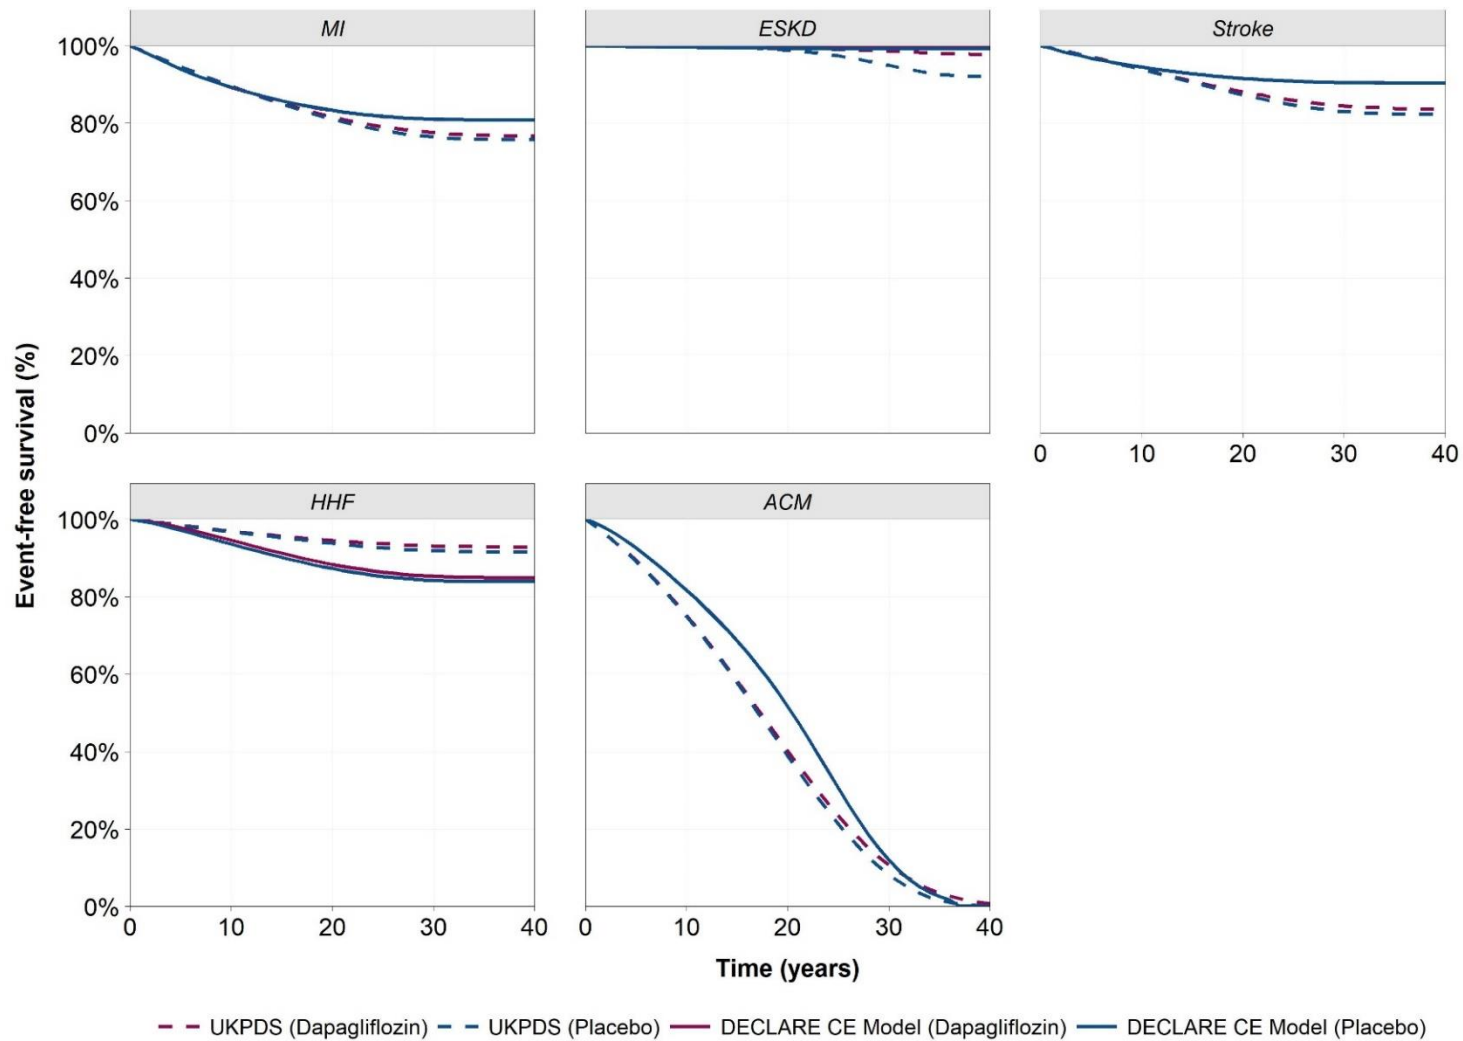

**Supplementary Figure 5.** Outcomes predicted for the no prior HF DECLARE population using the DECLARE CE Model, validated to UKPDS 82 equations  
 ACM: all-cause mortality; ESKD: end-stage kidney disease; HHF: hospitalisation for heart failure; MI: myocardial infarction

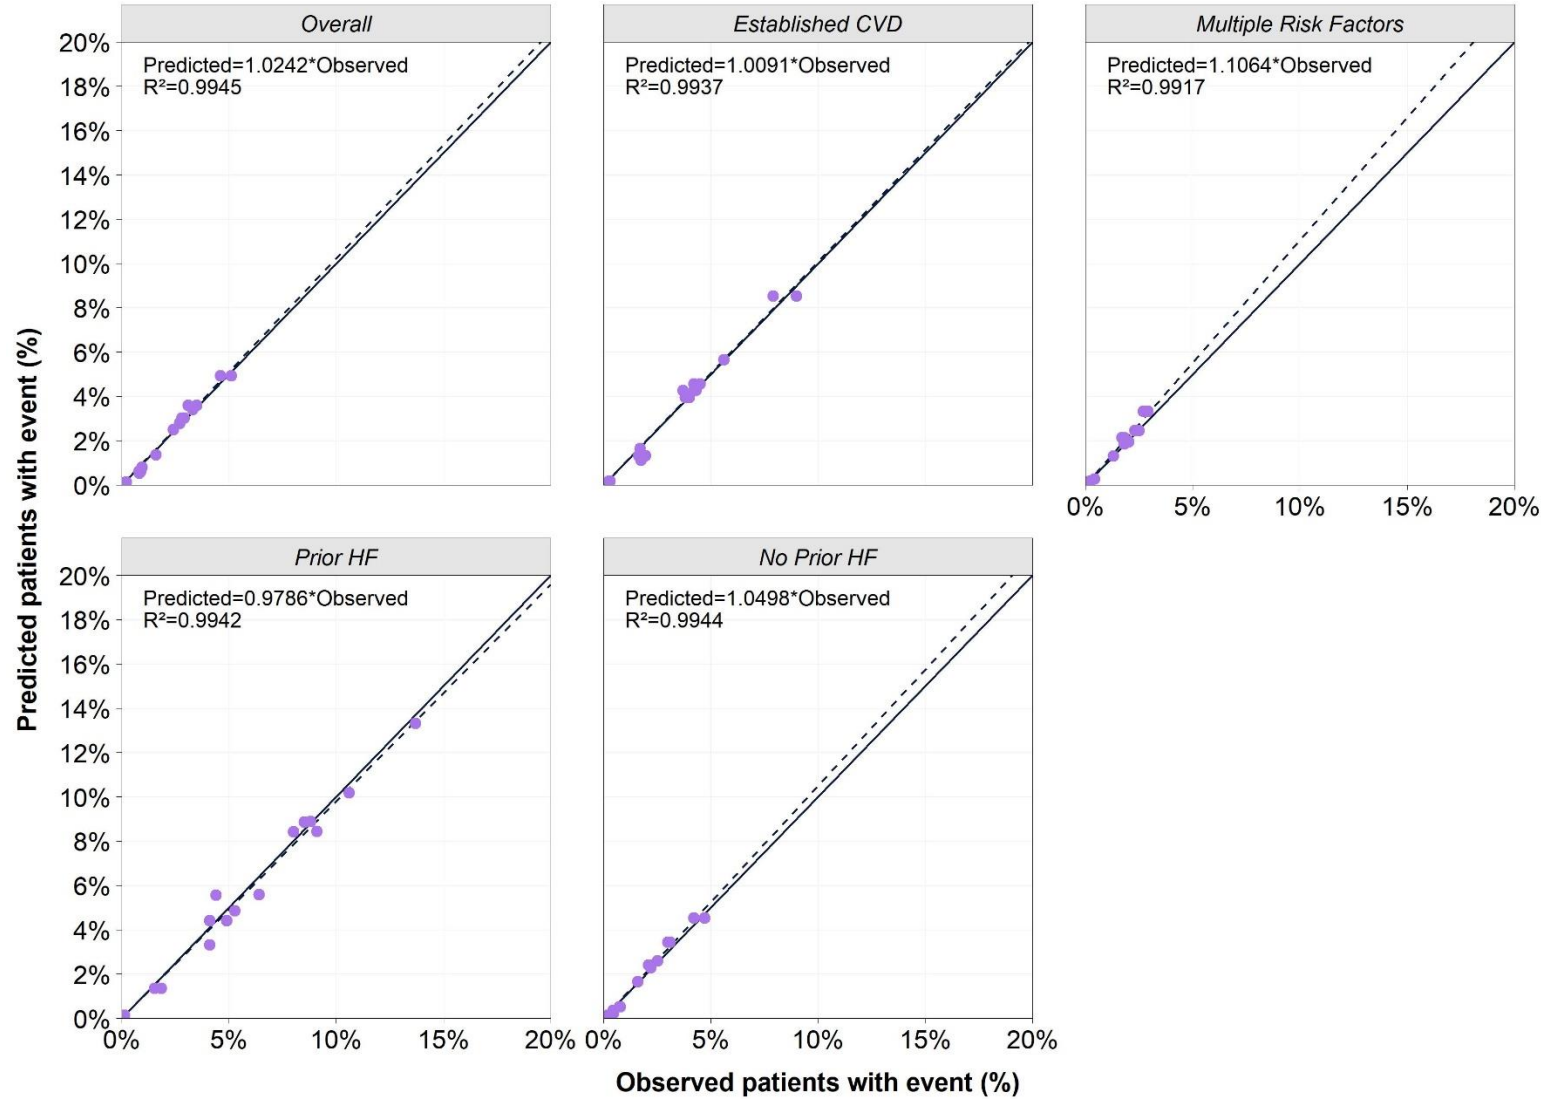

**Supplementary Figure 6.** Outcomes from the DECLARE CE model over a 4.2 year time horizon, validated against DECLARE-TIMI 58 trial results  
 CVD: cardiovascular disease; HF: heart failure

## References

1. Wiviott SD, Raz I, Bonaca MP, et al. Dapagliflozin and Cardiovascular Outcomes in Type 2 Diabetes. *New England Journal of Medicine*. 2019;380(4):347–57.
2. Mosenzon O, Wiviott SD, Cahn A, et al. Effects of dapagliflozin on development and progression of kidney disease in patients with type 2 diabetes: an analysis from the DECLARE-TIMI 58 randomised trial. *The Lancet Diabetes & Endocrinology*. 2019;7(8):606–17.
3. Clarke P, Gray A, Holman R. Estimating utility values for health states of type 2 diabetic patients using the EQ-5D (UKPDS 62). *Med Decis Making*. 2002;22(4):340–9.
4. NHS Improvement. National Cost Collection for the NHS. . 2020. Available from: <https://improvement.nhs.uk/resources/national-cost-collection/>.
5. Sullivan PW, Slejko JF, Sculpher MJ, et al. Catalogue of EQ-5D scores for the United Kingdom. *Med Decis Making*. 2011;31(6):800-4.
6. National Institute for Health and Care Excellence (NICE). Clinical guideline [CG181]: Cardiovascular disease: risk assessment and reduction, including lipid modification. 2016. Available at: <https://www.nice.org.uk/guidance/cg181/evidence> [Accessed
7. Alva ML, Gray A, Mihaylova B, et al. The impact of diabetes-related complications on healthcare costs: new results from the UKPDS (UKPDS 84). *Diabet Med*. 2015;32(4):459–66.
8. Bagust A, Beale S. Modelling EuroQol health-related utility values for diabetic complications from CODE-2 data. *Health Econ*. 2005;14(3):217–30.
9. Gorodetskaya I, Zenios S, McCulloch CE, et al. Health-related quality of life and estimates of utility in chronic kidney disease. *Kidney Int*. 2005;68(6):2801–8.
10. National Institute for Health and Care Excellence (NICE). Clinical guideline [CG182]: Chronic kidney disease in adults: assessment and management. . 2014. Available at: <https://www.nice.org.uk/guidance/cg182/> [Accessed
11. Lamping DL, Constantinovici N, Roderick P, et al. Clinical outcomes, quality of life, and costs in the North Thames Dialysis Study of elderly people on dialysis: a prospective cohort study. *Lancet*. 2000;356(9241):1543-50.
12. Wasserfallen JB, Halabi G, Saudan P, et al. Quality of life on chronic dialysis: comparison between haemodialysis and peritoneal dialysis. *Nephrol Dial Transplant*. 2004;19(6):1594–9.
13. Dhatariya KK, Skedgel C, Fordham R. The cost of treating diabetic ketoacidosis in the UK: a national survey of hospital resource use. *Diabet Med*. 2017;34(10):1361-6.
14. Personal Social Services Research Unit (PSSRU). Unit Costs of Health and Social Care 2019. . 2020. Available from: <https://www.pssru.ac.uk/project-pages/unit-costs/unit-costs-2019/>.
15. Barry HC, Ebell MH, Hickner J. Evaluation of suspected urinary tract infection in ambulatory women: a cost-utility analysis of office-based strategies. *J Fam Pract*. 1997;44(1):49–60.
16. Haymarket Media Group Ltd. Monthly Index of Medical Specialities. . Available from: <https://www.mims.co.uk/>
17. Lane S, Levy AR, Mukherjee J, et al. The impact on utilities of differences in body weight among Canadian patients with type 2 diabetes. *Curr Med Res Opin*. 2014;30(7):1267–73.
18. Birkeland KI, Bodegard J, Norhammar A, et al. How representative of a general type 2 diabetes population are patients included in cardiovascular outcome trials with SGLT2 inhibitors? A large European observational study. *Diabetes Obes Metab*. 2018:968–74.
